# Supplementary material
Source: publisher figshare collection journal article supplement (https://acs.figshare.com/ndownloader/files/5511677)
Supplement: Supplementary file 1 [file 5511677]

# Supporting Information

## Self-Sorting in the Formation of Metal–Organic Nanotubes: A Crucial Role of 2D Cooperative Interactions

Maiko Obana, Takahiro Fukino,\* Takaaki Hikima, and Takuzo Aida\*

\*To whom correspondence should be addressed.

E-mail: fukino@macro.t.u-tokyo.ac.jp (T.F.); aida@macro.t.u-tokyo.ac.jp (T.A.)

### Table of Contents

|                                                       |            |
|-------------------------------------------------------|------------|
| <b>1. General .....</b>                               | <b>S2</b>  |
| <b>2. Synthesis .....</b>                             | <b>S3</b>  |
| <b>3. NMR Spectroscopy .....</b>                      | <b>S4</b>  |
| <b>4. Small Angle X-ray Scattering Analysis .....</b> | <b>S6</b>  |
| <b>5. Transmission Electron Microscopy .....</b>      | <b>S7</b>  |
| <b>6. X-Ray Diffraction Analysis .....</b>            | <b>S8</b>  |
| <b>7. Evaluation of Formation Constants .....</b>     | <b>S8</b>  |
| <b>8. Statistical Prediction .....</b>                | <b>S9</b>  |
| <b>9. Supporting References .....</b>                 | <b>S10</b> |

## 1. General

All reagents were purchased from Kanto Chemical, Aldrich, Tokyo Chemical Industry (TCI), or Wako Pure Chemical Industries, and used as received without further purification unless otherwise noted. **FcL1**, **FcL2**, **L2**, and **1** were prepared according to reported procedures.<sup>S1</sup> <sup>1</sup>H (500 MHz) and <sup>13</sup>C NMR (126 MHz) spectra were recorded on a JEOL model JNM-ECA 500II spectrometer. Chemical shifts ( $\delta$ ) are reported in ppm relative to the internal standard tetramethylsilane ( $\delta = 0.00$  ppm; <sup>1</sup>H NMR) or to the solvent signal of CDCl<sub>3</sub> ( $\delta = 77.0$  ppm; <sup>13</sup>C NMR). Matrix-assisted laser desorption/ionization time-of-flight mass (MALDI-TOF MS) spectrometry measurements were carried out on a Bruker Daltonics autoflex<sup>TM</sup> speed MALDI-TOF/TOF spectrometer using  $\alpha$ -cyano-4-hydroxy cinnamic acid (CCA) as the matrix. Transmission electron micrographs (TEM) were recorded on a JEOL model JEM-1400 electron microscope operating at 120 kV. Samples were deposited on a Cu specimen grid, covered with thin polymer and carbon support films, manufactured by Okenshoji Co., Ltd. Small-angle X-ray scattering (SAXS) and 2D X-ray diffraction (2D XRD) experiments were carried out at the BL45XU beamline of SPring-8 (Hyogo, Japan)<sup>S2</sup> using a Rigaku model R-Axis IV++ area detector. The scattering vector ( $q = 4\pi\sin\theta/\lambda$ ) and the position of the incident X-ray beam on the detector were calibrated using several orders of layer reflections from silver behenate ( $d = 58.380$  Å), where  $2\theta$  and  $\lambda$  denominate the scattering angle and the wavelength of the X-ray beam (1.0 Å), respectively. Sample-to-detector distances of 1.5 and 0.4 m were used for SAXS and 2D XRD measurements, respectively. Sample solutions for SAXS measurements were placed inside a metallic cell (thickness: 3 mm) with quartz windows. Recorded scattering/diffraction images were integrated along the Debye-Scherrer ring using the FIT2D software,<sup>S3</sup> thus affording one-dimensional intensity data. Column chromatography on silica gel was performed on a Biotage Isolera Spektra equipped with a SNAP HP-Sil 10 g cartridge. Preparative HPLC was performed at room temperature using an ODS column ( $\phi$ : 20 mm, length: 250 mm; Wakopak Wakosil-II 5C18 AR) on a Japan Analytical Industry model LC-9130 recycling preparative HPLC system.

## 2. Synthesis

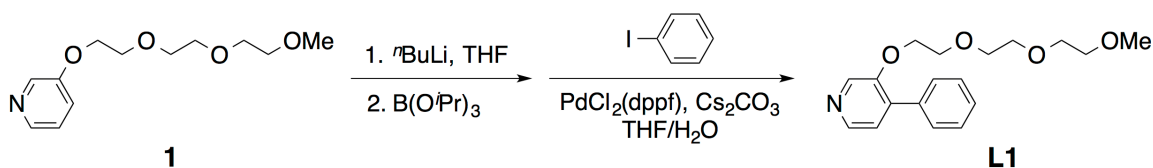

**Compound L1.** To a THF solution (1.85 mL) of **1**<sup>S1</sup> (400 mg, 1.66 mmol) was added a hexane solution (0.65 mL) of *n*BuLi (2.6 M, 1.66 mmol) under Ar at  $-78^{\circ}\text{C}$ . The resulting mixture was stirred at  $-78^{\circ}\text{C}$  for 10 min, then at  $0^{\circ}\text{C}$  for 10 min, and again cooled to  $-78^{\circ}\text{C}$ . Subsequently, triisopropyl borate (457 mg, 2.43 mmol) was added, and then the reaction mixture was allowed to warm to  $25^{\circ}\text{C}$ , where it was stirred for 30 min. Then, water (0.15 mL) was added to the resulting suspension, and the mixture was stirred for 1 h at  $25^{\circ}\text{C}$ . To this reaction mixture were successively added iodobenzene (676 mg, 3.32 mmol) and  $\text{Cs}_2\text{CO}_3$  (1.62 g, 4.97 mmol). After degassing via three freeze-pump-thaw cycles,  $\text{PdCl}_2(\text{dppf})\cdot\text{CH}_2\text{Cl}_2$  (135 mg, 0.166 mmol) was added, and the resultant mixture was heated to reflux for 17 h. After cooling to  $25^{\circ}\text{C}$ , the reaction mixture was evaporated to dryness, and the resulting waxy residue was dissolved in  $\text{CH}_2\text{Cl}_2$  and washed with water. The organic phase was separated, dried over anhydrous  $\text{Na}_2\text{SO}_4$ , filtered, and evaporated to dryness. The obtained residue was subjected to column chromatography on silica gel ( $\text{CH}_2\text{Cl}_2/\text{THF} = 92:8$  to  $34:66$ , v/v). The fraction containing the target compound was collected and evaporated to dryness. The residue was then subjected to recycling preparative HPLC on an ODS column with  $\text{CH}_3\text{CN}/\text{MeOH}$  (10:1, v/v) as the eluent, which afforded **L1** as a colorless oil in 1.7% yield (9.0 mg, 0.031 mmol).  $^1\text{H}$  NMR (500 MHz,  $\text{CDCl}_3$ ):  $\delta$  (ppm) 8.38 (br, 1H), 8.32 (br, 1H), 7.64–7.61 (m, 2H), 7.45–7.41 (m, 2H), 7.40–7.36 (m, 1H), 7.28 (br, 1H), 4.22 (t,  $J = 5$  Hz, 2H), 3.80 (t,  $J = 5$  Hz, 2H), 3.65–3.63 (m, 2H), 3.63–3.60 (m, 4H), 3.54–3.51 (m, 2H), 3.37 (s, 3H).  $^{13}\text{C}$  NMR (126 MHz,  $\text{CDCl}_3$ ):  $\delta$  (ppm) 152.04, 143.27, 137.95, 136.16, 135.65, 129.27, 128.23, 128.18, 124.43, 71.89, 70.86, 70.65, 70.54, 69.55, 68.99, 59.02. HRMS (MALDI-TOF MS)  $m/z$  calcd. for  $\text{C}_{18}\text{H}_{24}\text{NO}_4$   $[\text{M}+\text{H}]^+$ : 318.1705; found: 318.1712.

### 3. NMR Spectroscopy

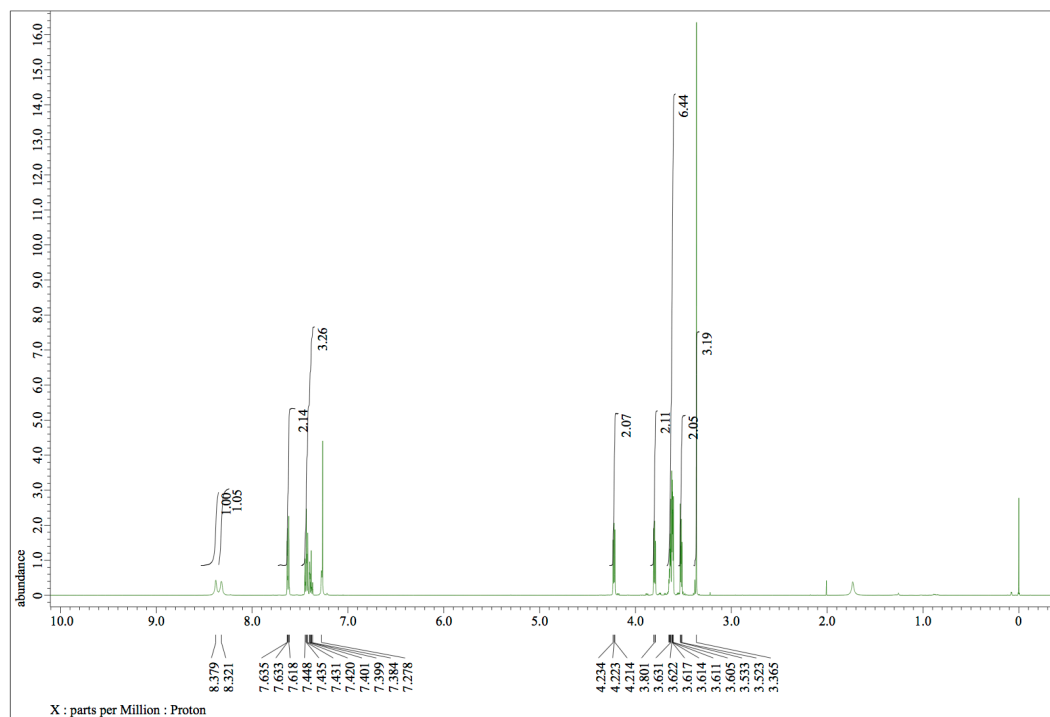

**Figure S1.**  $^1\text{H}$  NMR (500 MHz) spectrum of L1 in  $\text{CDCl}_3$  at  $20^\circ\text{C}$ .

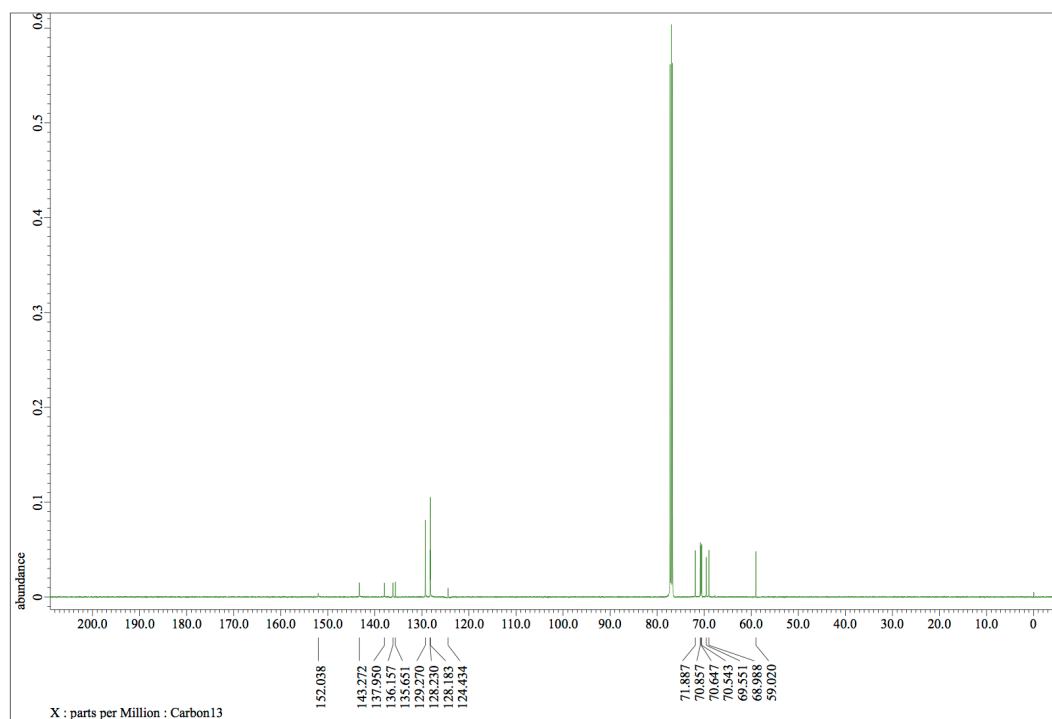

**Figure S2.** <sup>13</sup>C NMR (126 MHz) spectrum of **L1** in CDCl<sub>3</sub> at 20 °C.

#### 4. Small Angle X-ray Scattering Analysis

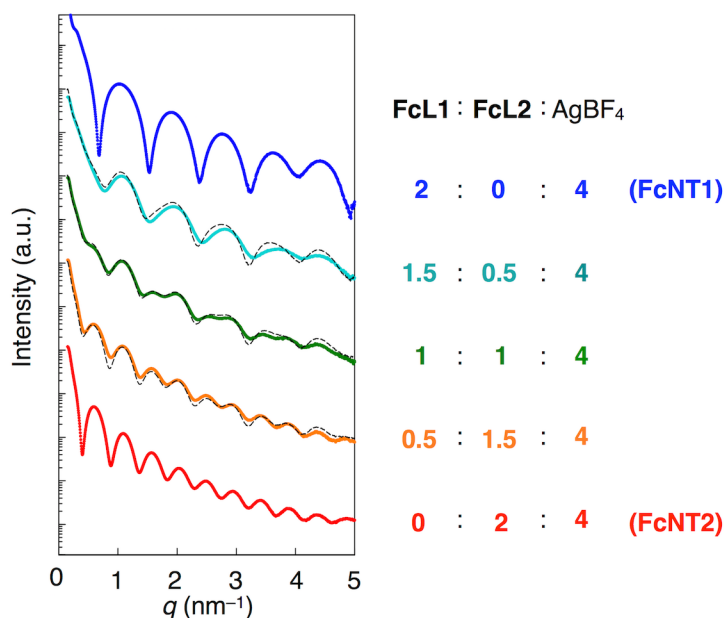

**Figure S3.** SAXS profiles of MeCN dispersions of **FcNT1** (blue) and **FcNT2** (red) as well as mixtures of **FcL1**, **FcL2**, and **AgBF<sub>4</sub>** at molar ratios of 1.5:0.5:4 (cyan), 1:1:4 (green), and 0.5:1.5:4 (orange) (**[FcL1]** + **[FcL2]** = 10 mM, **[AgBF<sub>4</sub>]** = 20 mM) at 20 °C. The broken curves superimposed on the cyan, green, and orange curves represent calculated profiles for mixtures of **FcNT1** (blue) and **FcNT2** (red) curves at ratios of 1.5:0.5, 1:1, and 0.5:1.5, respectively. For clarity, the scattering intensities at the molar ratios of 2:0:4 (blue), 1.5:0.5:4 (cyan), 0.5:1.5:4 (orange), and 0:2:4 (red) are offset by a factor of  $10^4$ ,  $10^2$ ,  $10^{-2}$ , and  $10^{-4}$ , respectively, and the broken curves superimposed on the cyan and orange curves are offset by the same factors as the corresponding intensities.

## 5. Transmission Electron Microscopy

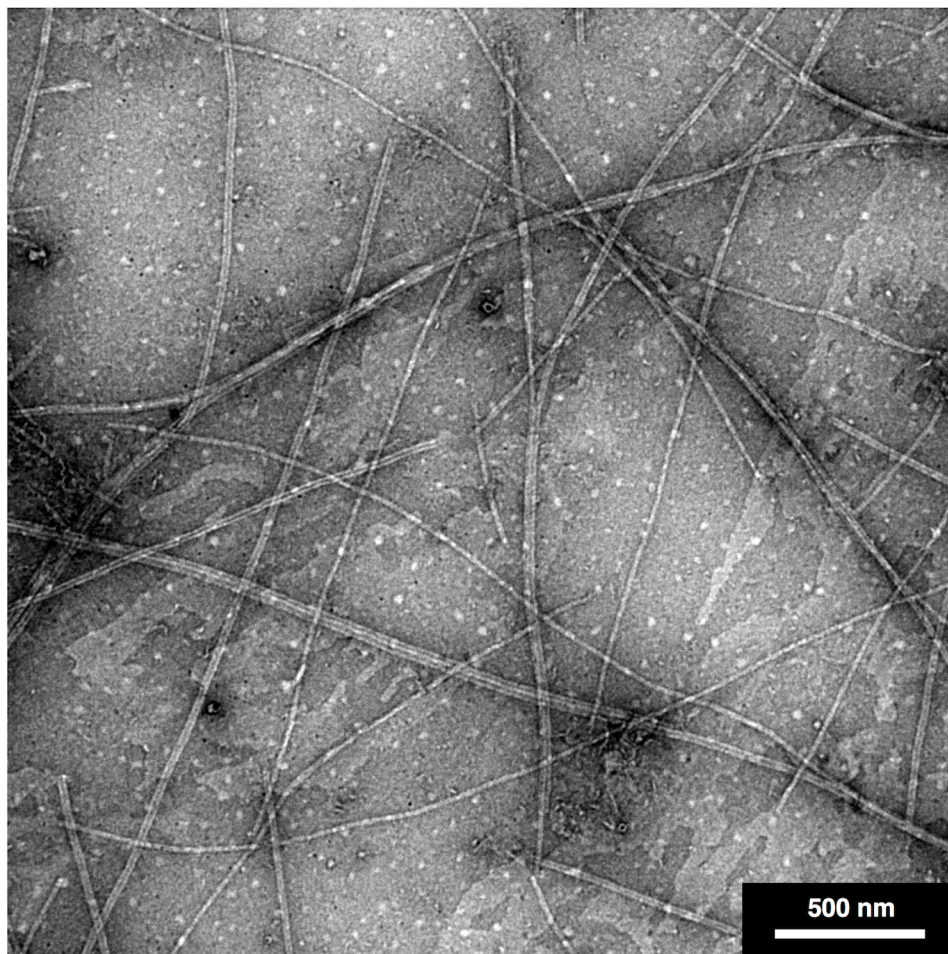

**Figure S4.** TEM image of an air-dried MeCN/EtOH/water dispersion of an assembled mixture of **FcL1**, **FcL2**, and  $\text{AgBF}_4$  in MeCN ( $[\text{FcL1}] = [\text{FcL2}] = 5.0 \text{ mM}$ ;  $[\text{AgBF}_4] = 20 \text{ mM}$ ). The sample was negatively stained with uranyl acetate.

## 6. X-Ray Diffraction Analysis

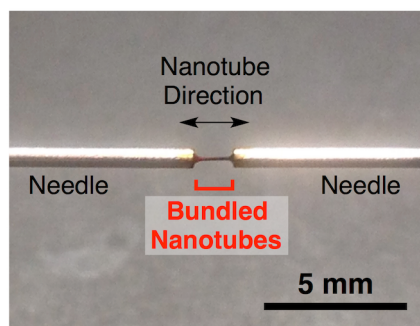

**Figure S5.** Photograph of the setup for air-dried sample preparation of unidirectionally orientated ferrocene-based metal–organic nanotubes for 2D XRD analysis (Figure 4).

**Table S1.** Parameters of simplified atomistic models used for simulation of 2D XRD patterns in the HELIX program<sup>S4</sup> (Figure 4).

| Corresponding Nanotube | Geometry  | Radial Position (nm) | Axial Separation (nm) | Rotation Angle (degree) |
|------------------------|-----------|----------------------|-----------------------|-------------------------|
| <b>FcNT1</b>           | Helix     | 3.7                  | 0.70                  | 4                       |
| <b>FcNT1</b>           | Non-Helix | 3.7                  | 0.70                  | 0                       |
| <b>FcNT2</b>           | Helix     | 6.7                  | 0.68                  | 4                       |
| <b>FcNT2</b>           | Non-Helix | 6.7                  | 0.68                  | 0                       |

## 7. Evaluation of Association Constants

Association constants for  $[\text{Ag}(\text{L})]^+$  and  $[\text{Ag}(\text{L})_2]^+$  ( $\text{L} = \text{L1}$  and  $\text{L2}$ ) were obtained from applying a nonlinear curve-fitting method using the WinEQNMR2 program<sup>S5</sup> to chemical shift changes of the signals associated with the pyridyl  $\alpha$ -protons of  $\text{L}$  upon titration of  $\text{L}$  with  $\text{AgBF}_4$  in  $\text{CD}_3\text{CN}$  (Figure 4). As  $\text{Ag}(\text{I})$  ions and pyridine derivatives form 1:2 complexes in  $\text{CH}_3\text{CN}$ ,<sup>S6</sup> a 1:2 complexation model was employed for the analysis.



## 8. Statistical Prediction

| FcL1:FcL2<br>Ratio | Symmetry | Possible<br>Cross-sectional<br>Model                                                | Possible<br>Sequence                                                                                               | Probability of<br>Occurrence |
|--------------------|----------|-------------------------------------------------------------------------------------|--------------------------------------------------------------------------------------------------------------------|------------------------------|
| 10:0               | $C_{10}$ |    | <div>1 2 3 4 5 6 7 8 9 10</div>  | $\frac{1}{1024}$             |
| 8:2                | $C_2$    |    |                                  | $\frac{5}{1024}$             |
| 6:4                | $C_2$    |    |                                  | $\frac{5}{1024}$             |
| 6:4                | $C_2$    |    |                                 | $\frac{5}{1024}$             |
| 5:5                | $C_5$    |  |                                | $\frac{2}{1024}$             |
| 4:6                | $C_2$    |  |                                | $\frac{5}{1024}$             |
| 4:6                | $C_2$    |  |                                | $\frac{5}{1024}$             |
| 2:8                | $C_2$    |  |                                | $\frac{5}{1024}$             |
| 0:10               | $C_{10}$ |  |                                | $\frac{1}{1024}$             |

**Figure S6.** Statistical probabilities of decagonal cross sections of possible nanotubes.

## 9. Supporting References

- (S1) Fukino, T.; Joo, H.; Hisada, Y.; Obana, M.; Yamagishi, H.; Hikima, T.; Takata, M.; Fujita, N.; Aida, T. *Science* **2014**, *344*, 499.
- (S2) Fujisawa, T.; Inoue, K.; Oka, T.; Iwamoto, H.; Uruga, T.; Kumasaka, T.; Inoko, Y.; Yagi, N.; Yamamoto, M.; Ueki, T. *J. Appl. Crystallogr.* **2000**, *33*, 797.
- (S3) <http://www.esrf.eu/computing/scientific/FIT2D/>
- (S4) Knupp, C.; Squire, J. M. *J. Appl. Crystallogr.* **2004**, *37*, 832.
- (S5) Hynes, M. J. *J. Chem. Soc., Dalton Trans.* **1993**, 311.
- (S6) (a) Di Bernardo, P.; Melchior, A.; Portanova, R.; Tolazzi, M.; Zanonato, P. L. *Coord. Chem. Rev.* **2008**, *252*, 1270. (b) Ignaczak, M.; Grzejdziak, A. *Monatsh. Chem.* **1984**, *115*, 943.
